# Supplementary material
Source: HighWire-hosted journal article supplement (https://www.cmajopen.ca/highwire/filestream/80774/field_highwire_adjunct_files/0/open-2014-0005-1-at.pdf)
Supplement: open-2014-0005-1-at.pdf [file open-2014-0005-1-at.pdf]

Appendix 1 (as supplied by the authors): Age-standardized rates (ASR) of cancer per 100 000 by 5 years of diagnosis, Alberta, Canada, 1975–2009. The rates are standardized to the 1991 Canadian cancer population. Note: APC = annual percentage change for 5 years of diagnosis.

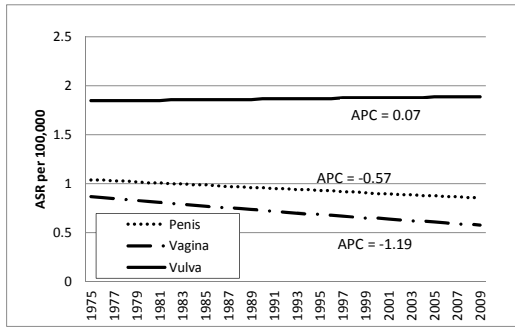

a. Vaginal, vulvar and penile cancers

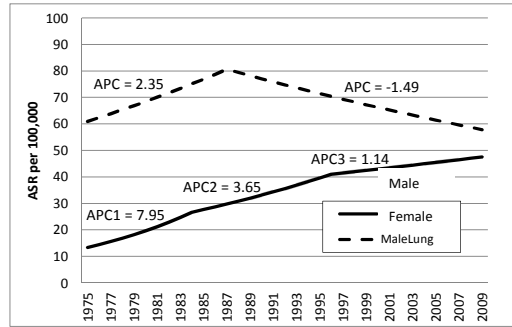

b. Lung cancer

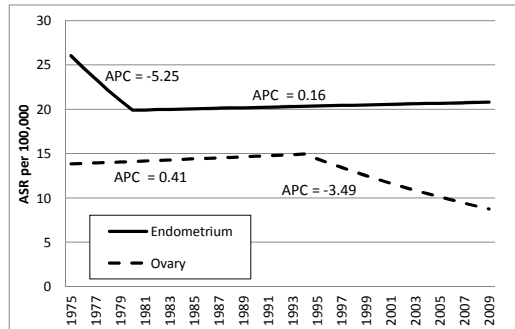

c. Endometrial and ovarian cancers

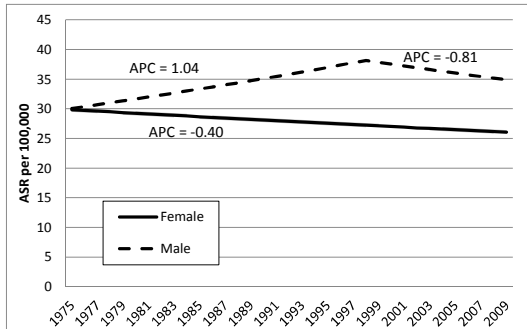

d. Colon cancer

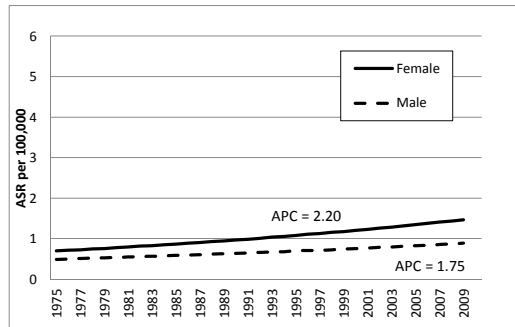

e. Anal cancer

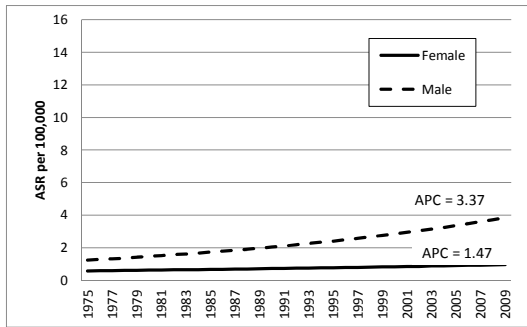

f. Oropharyngeal cancer

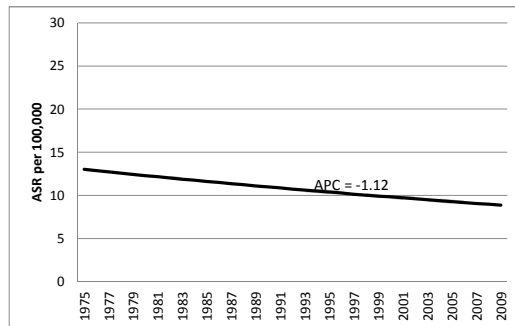

g. Cervical cancer

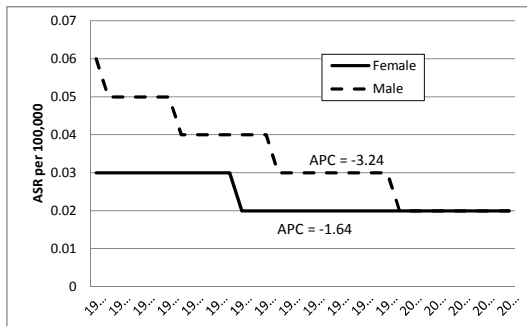

h. Lip and oral cavity cancers
